# Supplementary material
Source: MDPI journal article supplement (https://www.mdpi.com/2076-3417/13/3/2009)
Supplement: s1 [file s1]

Supplementary Information

**Cleaning Phenolic Compounds Present in Water Using Salting-Out Effect with DCA-Based Ionic Liquids**

Olalla G. Sas<sup>\*</sup>, Ángeles Domínguez and Begoña González

Chemical Engineering Department, Campus Lagoas-Marcosende, University of Vigo,  
36310 Vigo, Spain;

admiguez@uvigo.es (Á.D.); bgp@uvigo.es (B.G.)

\* Correspondence: olallags83@uvigo.es

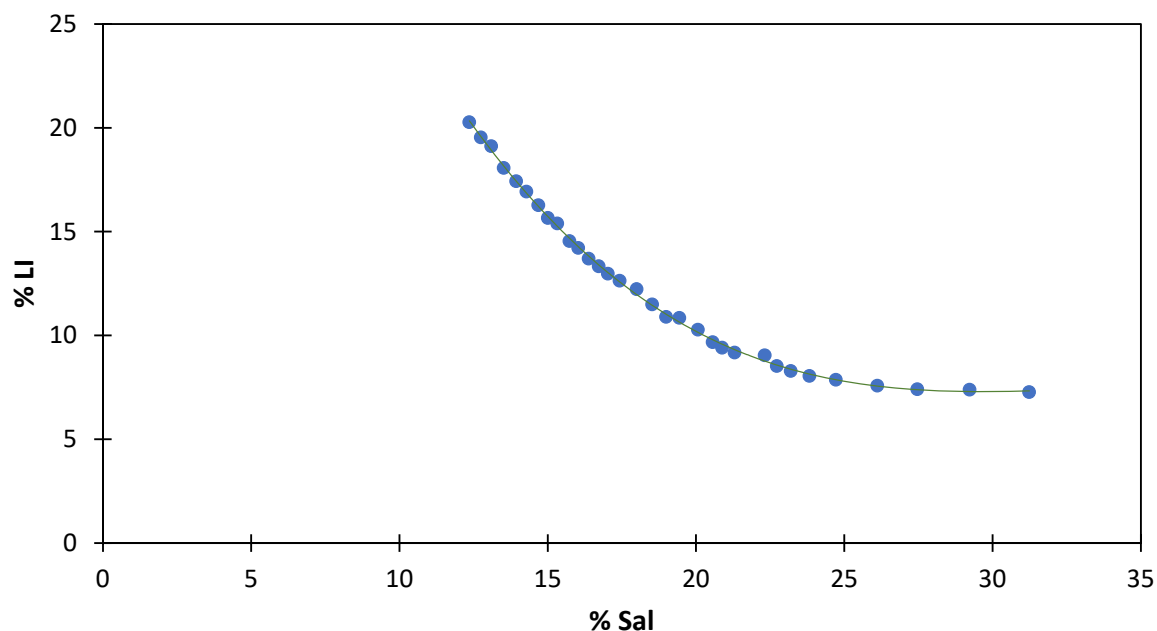

Figure S1. Binodal curve obtained for [EMim][DCA] + K<sub>3</sub>PO<sub>4</sub> system.

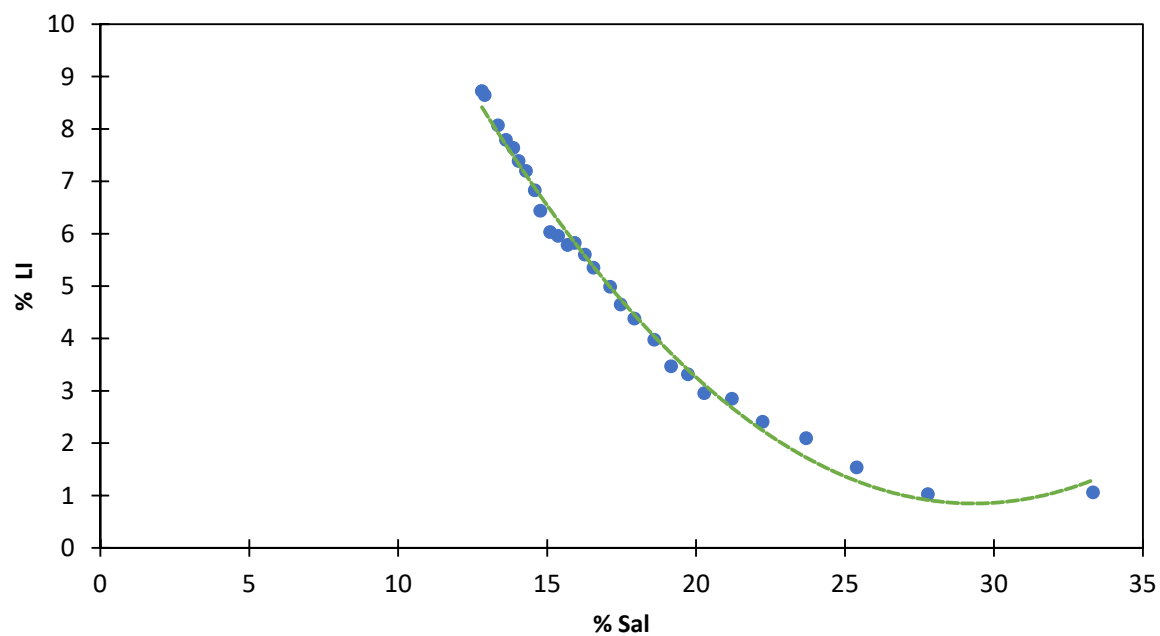

Figure S2. Binodal curve obtained for [BMim][DCA] + K<sub>3</sub>PO<sub>4</sub> system

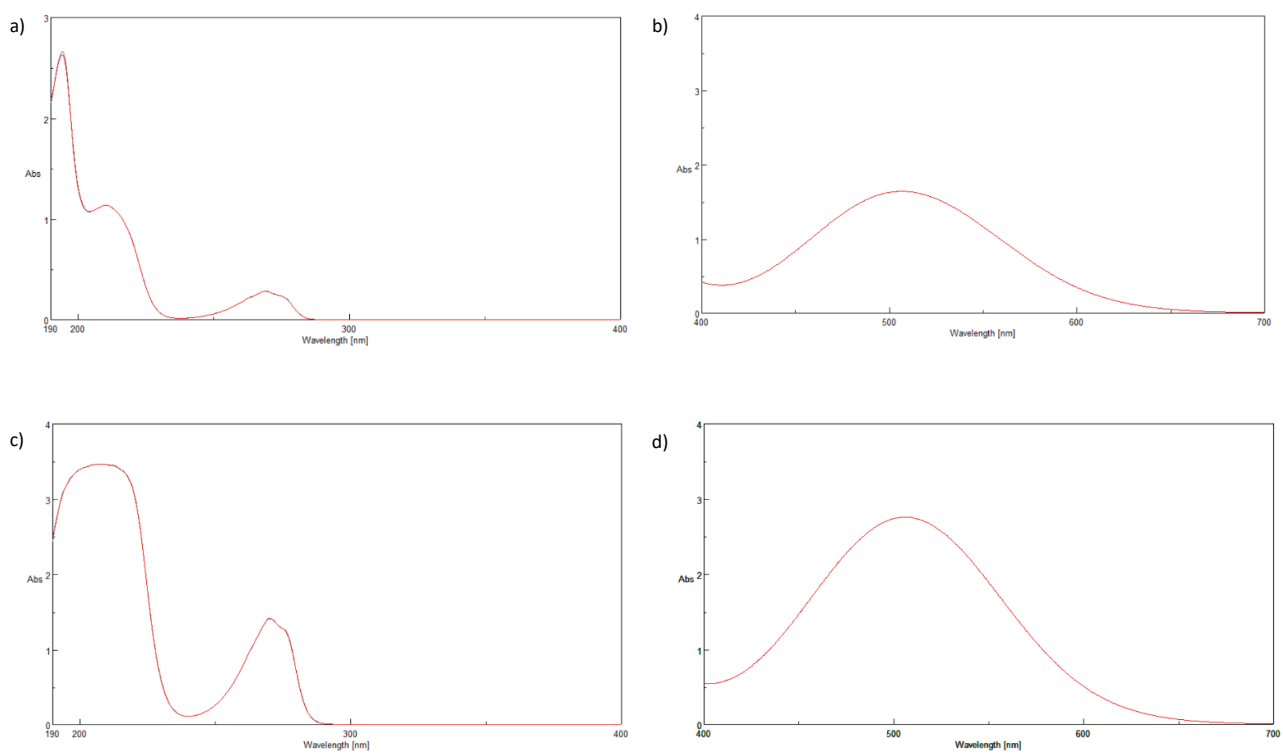

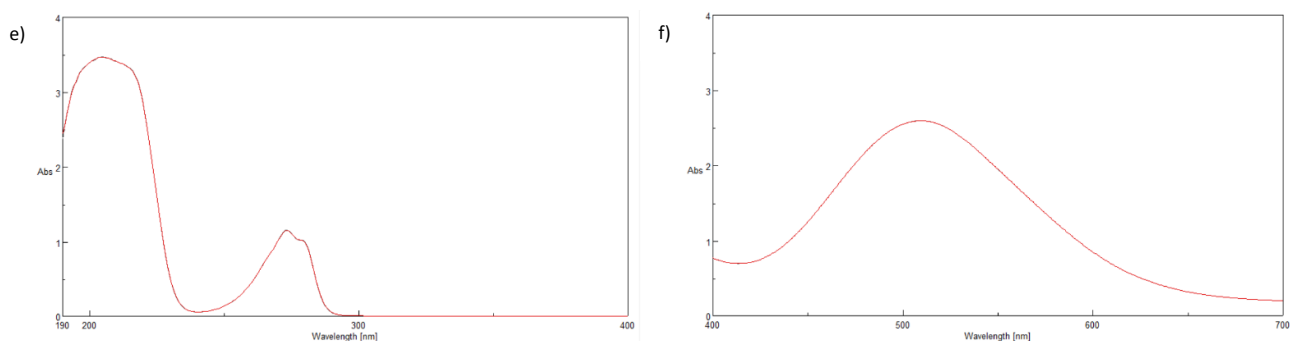

Figure S3. UV-Vis spectra obtained for the three studied phenolic compounds: a) phenol before the 4AAT reaction; b) phenol after 4 AAT reaction; c) o-cresol before 4AAT reaction; d) o-cresol after 4AAT reaction; e) 2-chlorophenol before 4AAT reaction; f) 2-chlorophenol after 4AAT reaction.

Table S1. Initial concentration  $C_i$  ( $\text{mg}\cdot\text{L}^{-1}$ ) vs final concentration  $C_f$  ( $\text{mg}\cdot\text{L}^{-1}$ ) of phenol, o-cresol, 2-chlorophenol and a mixture of phenolic compounds (PCM) after extraction process using [EMim][DCA] and [BMim][DCA] and 20%, 30% and 40% (w/v) of  $\text{K}_3\text{PO}_4$  at 298.15 K and  $P=101.3$  kPa

| $C_i$ ( $\text{mg}\cdot\text{L}^{-1}$ )         | $C_f$ ( $\text{mg}\cdot\text{L}^{-1}$ ) |          |                |        |
|-------------------------------------------------|-----------------------------------------|----------|----------------|--------|
|                                                 | Phenol                                  | o-cresol | 2-chlorophenol | PCM    |
| [EMim][DCA] + 20% $\text{K}_3\text{PO}_4$ (w/v) |                                         |          |                |        |
| 3                                               | 0.1849                                  | 0.1794   | 0.0192         | 0.0388 |
| 50                                              | 0.2289                                  | 0.8516   | 0.1212         | 0.0973 |
| 100                                             | 0.3855                                  | 0.2212   | 0.1266         | 0.1626 |
| 500                                             | 0.7115                                  | 2.689    | 0.2691         | 0.8498 |
| 1000                                            | 1.827                                   | 4.491    | 0.8520         | 2.912  |
| 2000                                            | 7.247                                   | 7.907    | 1.256          | 7.672  |
| 5000                                            | 15.37                                   | 26.27    | 2.363          | 17.43  |
| 10000                                           | 43.19                                   | 33.89    | 4.644          | 52.47  |
| 15000                                           | 98.04                                   | 77.13    | 12.80          | 102.8  |
| [EMim][DCA] + 30% $\text{K}_3\text{PO}_4$ (w/v) |                                         |          |                |        |
| 3                                               | 0.1820                                  | 0.0420   | 0.0253         | 0.0078 |
| 50                                              | 0.1642                                  | 0.0322   | 0.0546         | 0.0050 |
| 100                                             | 0.2340                                  | 0.1363   | 0.2508         | 0.0669 |
| 500                                             | 0.3938                                  | 0.2104   | 0.1871         | 0.2002 |
| 1000                                            | 0.7607                                  | 1.226    | 0.0146         | 0.6001 |
| 2000                                            | 1.655                                   | 0.578    | 0.2539         | 1.871  |
| 5000                                            | 3.926                                   | 3.158    | 0.5437         | 3.564  |
| 10000                                           | 5.225                                   | 7.492    | 0.8806         | 5.934  |
| 15000                                           | 11.40                                   | 9.532    | 2.158          | 18.36  |
| [EMim][DCA] + 40% $\text{K}_3\text{PO}_4$ (w/v) |                                         |          |                |        |
| 3                                               | 0.1045                                  | 0.1781   | 0.0383         | 0.0050 |
| 50                                              | 0.1346                                  | 0.1819   | 0.0422         | 0.0050 |
| 100                                             | 0.1154                                  | 0.1883   | 0.0029         | 0.0237 |

|                                                        |        |        |        |        |
|--------------------------------------------------------|--------|--------|--------|--------|
| 500                                                    | 0.1164 | 0.3410 | 0.0509 | 0.0775 |
| 1000                                                   | 0.1882 | 0.5266 | 0.0958 | 0.1901 |
| 2000                                                   | 0.7013 | 0.8205 | 0.0958 | 0.1826 |
| 5000                                                   | 0.3059 | 2.091  | 0.2724 | 0.2091 |
| 10000                                                  | 4.110  | 5.385  | 0.7385 | 1.463  |
| 15000                                                  | 8.123  | 9.397  | 1.658  | 2.149  |
| [BMim][DCA] + 20% K <sub>3</sub> PO <sub>4</sub> (w/v) |        |        |        |        |
| 3                                                      | 0.1198 | 0.2057 | 0.0533 | 0.0029 |
| 50                                                     | 0.4073 | 0.4599 | 0.1204 | 0.0885 |
| 100                                                    | 0.5921 | 0.0800 | 0.0912 | 0.1503 |
| 500                                                    | 1.785  | 1.808  | 0.1209 | 0.9220 |
| 1000                                                   | 7.416  | 5.280  | 0.6374 | 4.343  |
| 2000                                                   | 12.07  | 9.271  | 1.265  | 7.074  |
| 5000                                                   | 21.24  | 29.89  | 4.799  | 20.07  |
| 10000                                                  | 62.13  | 58.75  | 13.67  | 174.9  |
| 15000                                                  | 219.8  | 144.9  | 184.5  | 393.7  |
| [BMim][DCA] + 30% K <sub>3</sub> PO <sub>4</sub> (w/v) |        |        |        |        |
| 3                                                      | 0.0568 | 0.6565 | 0.0721 | 0.0139 |
| 50                                                     | 0.0666 | 0.1384 | 0.0649 | 0.0314 |
| 100                                                    | 0.0563 | 0.1630 | 0.0435 | 0.0482 |
| 500                                                    | 0.2544 | 0.6099 | 0.0734 | 0.1648 |
| 1000                                                   | 0.9132 | 1.162  | 0.1538 | 0.5117 |
| 2000                                                   | 4.226  | 2.959  | 0.1612 | 1.725  |
| 5000                                                   | 10.68  | 10.02  | 0.7869 | 6.927  |
| 10000                                                  | 23.27  | 21.23  | 1.507  | 68.08  |
| 15000                                                  | 84.01  | 46.10  | 19.22  | 98.67  |
| [BMim][DCA] + 40% K <sub>3</sub> PO <sub>4</sub> (w/v) |        |        |        |        |
| 3                                                      | 0.1271 | 0.0582 | 0.0096 | 0.0910 |
| 50                                                     | 0.1123 | 0.0551 | 0.0096 | 0.0530 |
| 100                                                    | 0.1567 | 0.1232 | 0.0960 | 0.1095 |
| 500                                                    | 0.2527 | 0.2382 | 0.0960 | 0.1277 |
| 1000                                                   | 0.7196 | 0.4868 | 0.2379 | 0.3144 |
| 2000                                                   | 1.350  | 0.8766 | 0.2379 | 0.1709 |
| 5000                                                   | 4.941  | 2.823  | 0.4812 | 1.011  |
| 10000                                                  | 57.74  | 9.858  | 0.7298 | 17.77  |
| 15000                                                  | 95.68  | 22.44  | 1.7944 | 48.59  |

Table S2. Initial concentration  $C_i$  (mg·L<sup>-1</sup>) vs extraction efficiency (E%) of phenol, o-cresol, 2-chlorophenol and a mixture of phenolic compounds (PCM) after extraction process using [EMim][DCA] and [BMim][DCA] at 298.15 K and P=101.3 kPa

| Extraction Efficiency (E%)                             |        |          |                |       |
|--------------------------------------------------------|--------|----------|----------------|-------|
| $C_i$ (mg·L <sup>-1</sup> )                            | Phenol | o-cresol | 2-chlorophenol | PCM   |
| [EMim][DCA] + 20% K <sub>3</sub> PO <sub>4</sub> (w/v) |        |          |                |       |
| 0.003                                                  | 93.84  | 94.02    | 99.36          | 98.71 |
| 0.05                                                   | 99.54  | 98.30    | 99.76          | 99.81 |
| 0.1                                                    | 99.61  | 99.78    | 99.87          | 99.84 |
| 0.5                                                    | 99.86  | 99.46    | 99.95          | 99.83 |
| 1                                                      | 99.82  | 99.55    | 99.91          | 99.71 |
| 2                                                      | 99.64  | 99.60    | 99.94          | 99.62 |

|                                                        |       |       |       |       |
|--------------------------------------------------------|-------|-------|-------|-------|
| 5                                                      | 99.69 | 99.47 | 99.95 | 99.65 |
| 10                                                     | 99.57 | 99.66 | 99.95 | 99.48 |
| 15                                                     | 99.35 | 99.49 | 99.91 | 99.31 |
| [EMim][DCA] + 30% K <sub>3</sub> PO <sub>4</sub> (w/v) |       |       |       |       |
| 0.003                                                  | 93.93 | 98.60 | 99.16 | 99.74 |
| 0.05                                                   | 99.67 | 99.94 | 99.89 | 99.99 |
| 0.1                                                    | 99.77 | 99.86 | 99.75 | 99.93 |
| 0.5                                                    | 99.92 | 99.96 | 99.96 | 99.96 |
| 1                                                      | 99.92 | 99.88 | 99.99 | 99.94 |
| 2                                                      | 99.92 | 99.97 | 99.99 | 99.91 |
| 5                                                      | 99.92 | 99.94 | 99.99 | 99.93 |
| 10                                                     | 99.95 | 99.93 | 99.99 | 99.94 |
| 15                                                     | 99.92 | 99.94 | 99.99 | 99.88 |
| [EMim][DCA] + 40% K <sub>3</sub> PO <sub>4</sub> (w/v) |       |       |       |       |
| 0.003                                                  | 96.52 | 94.06 | 98.72 | 99.83 |
| 0.05                                                   | 99.73 | 99.64 | 99.92 | 99.99 |
| 0.1                                                    | 99.88 | 99.81 | 99.99 | 99.98 |
| 0.5                                                    | 99.98 | 99.93 | 99.99 | 99.98 |
| 1                                                      | 99.98 | 99.95 | 99.99 | 99.98 |
| 2                                                      | 99.96 | 99.96 | 99.99 | 99.99 |
| 5                                                      | 99.99 | 99.96 | 99.99 | 99.99 |
| 10                                                     | 99.96 | 99.95 | 99.99 | 99.99 |
| 15                                                     | 99.95 | 99.94 | 99.99 | 99.99 |
| [BMim][DCA] + 20% K <sub>3</sub> PO <sub>4</sub> (w/v) |       |       |       |       |
| 0.003                                                  | 96.01 | 93.14 | 98.22 | 99.90 |
| 0.05                                                   | 99.19 | 99.08 | 99.76 | 99.82 |
| 0.1                                                    | 99.41 | 99.92 | 99.91 | 99.85 |
| 0.5                                                    | 99.64 | 99.64 | 99.98 | 99.82 |
| 1                                                      | 99.26 | 99.47 | 99.94 | 99.57 |
| 2                                                      | 99.40 | 99.54 | 99.94 | 99.65 |
| 5                                                      | 99.58 | 99.40 | 99.90 | 99.60 |
| 10                                                     | 99.38 | 99.41 | 99.86 | 98.25 |
| 15                                                     | 98.53 | 99.03 | 98.77 | 97.38 |
| [BMim][DCA] + 30% K <sub>3</sub> PO <sub>4</sub> (w/v) |       |       |       |       |
| 0.003                                                  | 98.11 | 78.12 | 97.60 | 99.54 |
| 0.05                                                   | 99.87 | 99.72 | 99.87 | 99.94 |
| 0.1                                                    | 99.94 | 99.84 | 99.96 | 99.95 |
| 0.5                                                    | 99.95 | 99.88 | 99.99 | 99.97 |
| 1                                                      | 99.91 | 99.88 | 99.98 | 99.95 |
| 2                                                      | 99.79 | 99.85 | 99.99 | 99.91 |
| 5                                                      | 99.79 | 99.80 | 99.98 | 99.86 |
| 10                                                     | 99.77 | 99.79 | 99.98 | 99.32 |
| 15                                                     | 99.44 | 99.69 | 99.87 | 99.34 |
| [BMim][DCA] + 40% K <sub>3</sub> PO <sub>4</sub> (w/v) |       |       |       |       |
| 0.003                                                  | 95.76 | 98.06 | 99.68 | 96.97 |
| 0.05                                                   | 99.78 | 99.89 | 99.98 | 99.89 |
| 0.1                                                    | 99.84 | 99.88 | 99.90 | 99.89 |
| 0.5                                                    | 99.95 | 99.95 | 99.98 | 99.97 |
| 1                                                      | 99.93 | 99.95 | 99.98 | 99.97 |
| 2                                                      | 99.93 | 99.96 | 99.99 | 99.99 |
| 5                                                      | 99.90 | 99.94 | 99.99 | 99.98 |

|    |       |       |       |       |
|----|-------|-------|-------|-------|
| 10 | 99.42 | 99.90 | 99.99 | 99.82 |
| 15 | 99.36 | 99.85 | 99.99 | 99.68 |

---
